1 **Gross anatomy of the Pacific hagfish, *Eptatretus burgeri*, with special**  
2 **reference to the coelomic viscera.**

3

4 Banri Muramatsu<sup>1</sup>, Daichi G. Suzuki<sup>2</sup>, Masakazu Suzuki<sup>1</sup>, Hiroki Higashiyama<sup>3\*</sup>

5

6

7 <sup>1</sup>Department of Biological Science, Graduate School of Science, Shizuoka University, Shizuoka  
8 422-8529, Japan.

9 <sup>2</sup>Faculty of Life and Environmental Sciences, University of Tsukuba, Tennodai, Tsukuba 305-8572  
10 Japan.

11 <sup>3</sup>Department of Physiological Chemistry and Metabolism, Graduate School of Medicine, The  
12 University of Tokyo, 7-3-1, Hongo, Bunkyo-ku, Tokyo 113-0033, Japan.

13

14

15 \*Correspondence: h-hiroki@m.u-tokyo.ac.jp

16

17

18 **Data availability**

19 All data are included in the manuscript.

20 **Funding statement**

21 This work has supported by the Grant-in-Aid for the Japan Society for the  
22 Promotion of Science (JSPS) 22K15164 (D.G.S), 17K07469 (M.S.), and  
23 20K15858 (H.H.).

24 **Conflict of interest**

25 The authors declare no competing interests.

26 **Abstract**

27 Hagfish (Myxinoidea) are a deep-sea taxon of cyclostomes, the extant jawless  
28 vertebrates. Many researchers have examined the anatomy and embryology of hagfish to shed  
29 light on the early evolution of vertebrates; however, the diversity within hagfish is often  
30 overlooked. Hagfish have two lineages, Myxiniinae and Eptatretinae. Usually, textbook  
31 illustrations of hagfish anatomy reflect the morphology of the former lineage, especially *Myxine*  
32 *glutinosa*, with its single pair of external branchial pores. Here, we instead report the gross  
33 anatomy of an Eptatretinae, *Eptatretus burgeri*, which has six pairs of branchial pores,  
34 especially focusing on the coelomic organs. Dissections were performed on fixed and unfixed  
35 specimens to provide a guide for those doing organ- or tissue-specific molecular experiments.  
36 Our dissections revealed that the ventral aorta is Y-branched in *E. burgeri*, which differs from  
37 the unbranched morphology of *Myxine*. Otherwise, there were no differences in the morphology  
38 of the lingual apparatus or heart in the pharyngeal domain. The thyroid follicles were scattered  
39 around the ventral aorta, as has been reported for adult lampreys. The hepatobiliary system more  
40 closely resembled those of jawed vertebrates than those of adult lampreys, with the liver having  
41 two lobes and a bile duct connecting the gallbladder to each lobe. Overall, the visceral  
42 morphology of *E. burgeri* does not differ significantly from that of the known *Myxine* at the  
43 level of gross anatomy, except for the number of branchial pores.

44

45

46 **KEYWORDS**

47 hagfish; anatomy; cyclostome; evolution; heart; liver; *Eptatretus burgeri*; *Eptatretus atami*

48

49 **INTRODUCTION**

50           One key to understanding the early evolution of vertebrates is to examine the  
51 morphology of our jawless sister group, the cyclostomes. This group and the gnathostomes  
52 (jawed vertebrate lineage) diverged about 500 million years ago (Kuraku & Kuratani, 2006).  
53 The cyclostome lineage has two subgroups: the lampreys (Petromyzontiformes) and hagfishes  
54 (Myxinoidea). Historically, these taxa have sometimes been considered paraphyletic, but today  
55 their monophyly is supported by molecular phylogeny (Mallatt & Sullivan, 1998; Kuraku et al.,  
56 1999; Takezaki et al., 2003; Kuraku, 2008; Heimberg et al., 2010) and comparative morphology  
57 (Yalden, 1985; Ota et al., 2007; Oisi et al., 2013). The absence of many characteristics of jawed  
58 vertebrates (e.g., jaws, paired nostrils, limbs, cucullaris muscles, and vertebral centra) makes  
59 cyclostomes essential organisms for studying vertebrate evolution (Janvier, 1996; Ota et al.,  
60 2011). In addition, they have many cyclostome-specific features (e.g., lingual apparatus, velum,  
61 and mucous cartilage) not found in jawed vertebrates (Janvier, 1996; Oisi et al., 2013), and  
62 whether these features are inherited from the common ancestors of vertebrates or are  
63 synapomorphies of cyclostomes remains controversial (Yokoyama et al., 2021; also see  
64 Sugahara, 2021). The morphology of the hagfishes is regarded to be highly derived, including  
65 the degeneration of eyes because of adaptation to the deep sea (Gabbott et al., 2016; Dong &  
66 Allison, 2021), and many studies have instead used lampreys as a model for cyclostomes.  
67 However, recent studies have suggested that some lamprey characteristics that had been  
68 regarded as ancestral to the cyclostomes, such as the larval-type oral apparatus (Miyashita et al.,  
69 2021) and the transformation of the larval endostyle into the thyroid after metamorphosis  
70 (Takagi et al., 2022), are in fact the derived state from the acquisition of the ammocoete larval  
71 stage. Lampreys and hagfish split around 470 to 390 million years ago (Kuraku & Kuratani,  
72 2006), and their morphology subsequently diverged. Thus, there is a strong need to gain a better

73 understanding of the anatomy of hagfishes.

74           Although the morphology of the hagfishes is often thought to be similar among species,  
75 they are, in fact, quite diverse. Hagfish are comprised of 2 subfamilies (Myxininae and  
76 Eptatretinae), 6 genera, and 88 species worldwide (Fricke et al., 2022). Differences in their  
77 morphology are most apparent in their branchial pores and horny teeth, which are often used to  
78 identify species (Jørgensen et al., 1998; Nelson et al., 2016; Fig. 1). The external branchial pores  
79 are located in the middle part of the body (Fig. 1a). The number and morphology of these pores  
80 differ among hagfish species and are essential traits for taxonomy (Dean, 1904; Fig. 1b). For  
81 example, the Eptatretinae have more than five pairs of external branchial pores, whereas the  
82 Myxininae have a single pair (Nelson et al., 2016; Fig. 1b). Currently, much of the anatomical  
83 literature focuses on one Myxininae species, *Myxine glutinosa*, and one Eptatretinae species,  
84 *Eptatretus stoutii* (syn. *Bdellostoma stoutii*) (Müller, 1834; Dean, 1904; Cole, 1907; Marinelli &  
85 Strenger, 1956; Ziermann et al., 2014). Of these, the most frequently cited study is by Marinelli  
86 & Strenger (1956), who produced detailed anatomical drawings of *M. glutinosa*, which has a  
87 single pair of branchial pores.

88           In the present paper, we focus on the anatomy of an Eptatretinae hagfish, the inshore  
89 hagfish *Eptatretus burgeri*. In East Asia, *E. burgeri* is commonly found in relatively shallow  
90 habitats. It is traditionally consumed and served as cuisine mainly in Korea and in some parts of  
91 Japan, where the species is easy to obtain (Gorbman et al., 1990; Honma, 1998). Recent  
92 embryological studies have been conducted on *E. burgeri*, and some knowledge on its  
93 comparative embryology is now available (Ota et al., 2007; Oisi et al., 2013, 2015). Gross  
94 anatomical description of a Japanese hagfish, probably this specie, has been done in the past in  
95 Japanese (Yamatsuta, 1903), but it is brief and not sufficient to discuss detailed comparative  
96 anatomy. Furthermore, we dissected unfixed specimens of hagfish, because we expect that

97 further work will be conducted to examine the detailed molecular biology of this animal with  
98 techniques such as single-cell RNA sequencing. For this purpose, the tissue or organ of interest  
99 must be isolated appropriately through dissection; however, since fixation with formalin affects  
100 the preservation of RNA (Li et al., 2014; Denisenko et al., 2020), sample collection should be  
101 performed on unfixed specimens whenever possible. Because fixed tissues differ in appearance  
102 from unfixed ones, anatomical descriptions of fixed specimens may not be suitable for  
103 researchers who aim to conduct such studies. Thus, in this study, we compare *E. burgeri*, which  
104 has six pairs of branchial pores, to *M. glutinosa* to advance a comprehensive understanding of  
105 hagfish morphology and provide information on hagfish tissues using both unfixed and fixed  
106 specimens.

107

## 108 **MATERIALS AND METHODS**

### 109 **Animals**

110 *Eptatretus burgeri* specimens were collected from Sagami Bay, Kanagawa Prefecture, Japan, in  
111 February (40-45 m depth) and May (80-100 m depth) 2020. The animals from the former  
112 location were transported to the Center for Education and Research in Field Sciences, Faculty of  
113 Agriculture, Shizuoka University, Japan, and the latter were sent to the laboratory at the  
114 University of Tsukuba, Japan. Brown hagfish (*Eptatretus atami*; syn. *Paramyxine atami*) were  
115 obtained from Suruga Bay, Yaizu, Shizuoka Prefecture, Japan, in February 2021 (320 m depth),  
116 and transferred to the Field Science Center, Shizuoka University. The hagfishes were kept in  
117 seawater at 10 °C before dissection. We identified these species based on external morphology,  
118 including the branchial pores and dental cusps (after Dean, 1904; see Fig. 1). All animal  
119 experiments were performed in accordance with the Guides for Care and Use of Laboratory  
120 Animals of Shizuoka University and the University of Tsukuba.

121

122 **Anesthesia, fixation, and dissection**

123 Hagfish were anesthetized with a mixture of 0.1% ethyl m-aminobenzoate (Nacalai tesque,  
124 Kyoto, Japan) and 0.1% sodium hydrogen carbonate (Wako, Osaka, Japan) in seawater. For  
125 fixation, we soaked the hagfish specimens in 20% formalin for two days and transferred them  
126 into 70% ethanol. We mainly followed Marinelli & Strenger (1956) for terminology.

127 **RESULTS**

128 **External morphology**

129 First, we describe the external morphology of *E. burgeri* (Fig. 2). *E. burgeri* is ochre to  
130 brownish red on its dorsal and lateral sides, with a pale dorsal midline skin fold, and white to  
131 ecru on its ventrum. Total lengths of our specimens were 39.5–58.0 cm. They have six pairs of  
132 external branchial pores (Fig. 2). The distance between each branchial pore is two or three times  
133 the branchial-pore diameter in *E. burgeri*. The caudal-most branchial pore on the left side is  
134 larger than the others because it is fused with the apertura ductus oesophageocutanei, as in other  
135 hagfish species (see also Dean, 1904).

136 Mucous pores open at regular intervals on the ventral side of the body in a pair of  
137 rows as with the external branchial pores. The rostral end of these rows is at about the same  
138 anterior–posterior position as the eyes, which is more anterior than the external branchial pores.  
139 These rows are also present on the tail, caudal to the cloaca, although they are interrupted  
140 around the cloaca (Fig. 2a). Rows of white and prolate-shaped mucous glands (glandular  
141 mucosa) are found under the mucous pores (Fig. 3).

142 On the dental plate, *E. burgeri* has three fused cusps in the anterior row and two fused  
143 cusps in the posterior row (Fig. 2). The number of unicuspid teeth varies among species, with  
144 some within-species differences (Jørgensen et al., 1998; Kase et al., 2017). Three pairs of  
145 tentacles are present on either side of the snout.

146 The above features are not so different in the other species in the same genus, *E. atami*  
147 (Fig. 2). *E. atami* is dark brown or blackish purple; the total lengths were 43.6–55.3 cm. The  
148 notable differences in the number of dental cusps and the distance between the branchial pores  
149 in *E. atami* compared to *E. burgeri*, but these two species have identical topographical  
150 relationships, including the internal organs. Thus, although there are minor differences in  
151 coloration and teeth, the number and topography of anatomical structures, such as branchial

152 pores and tentacles, are highly conserved in the same *Eptatretus* genus.

153

#### 154 **Lingual apparatus**

155 The body trunk of hagfishes is broadly covered with a thin layer of *m. parietalis* and *m.*  
156 *decussatus* (Fig. 3a). For unfixed *E. burgeri* specimens, we pinched the ventral skin rostral to  
157 the branchial region and just ventral to the lingual apparatus with tweezers and opened the  
158 abdomen along the midline (Fig. 3b, c).

159           The lingual apparatus is unique to cyclostomes, and differs from the tongue  
160 (hypobranchial musculature) of jawed vertebrates in that it is derived from the mandibular arch  
161 (i.e., the first pharyngeal arch; Oisi et al., 2015, and references within). The lingual apparatus is  
162 a prominent structure in the hagfish pharynx and provides mobility to the dental plate (Clark &  
163 Summers, 2007). It consists of the protractor muscles: *m. protractor cartilaginis*, *m. protractor*  
164 *dentium superficialis*, and *m. protractor dentium profundus* (Fig. 3c, d) that originate in the  
165 medial cartilaginous keel (*cartilago linguae basalis*) of the lingual apparatus and terminate in the  
166 dental plate. The main body of the thick rod-shaped lingual apparatus is dorsal to these  
167 protractor muscles. The rod-shaped structure is entirely covered by *m. tubulatus*, with the  
168 muscle fibers oriented horizontal to the body axis and encircling the rod-shaped structure. The  
169 longitudinal muscles (*m. longitudinalis linguae* and *m. perpendicularis*) are found medial to the  
170 *m. tubulatus*. These originate in the *cartalago muscoli perpendicularis* and terminate at the  
171 posteromedial part of the dental plate with the stiff tendon (*tendo muscoli longitudinalis*  
172 *linguae*). The muscles that make up the lingual apparatus were stiffened in our fixed specimens,  
173 but white and soft in unfixed samples with a texture that was clearly distinguishable from that of  
174 the other trunk muscles (Fig. 3c).

175

#### 176 **Branchial apparatus, heart, and thyroids**



177           The gills and heart are located caudal to the lingual apparatus in hagfish. These  
178 pharyngeal elements initially develop anterior to the head in the hagfish embryo, as in other  
179 vertebrates. During development, the anterior half of the head becomes elongated, and the gills  
180 and heart are shifted posteriorly (Oisi et al., 2013).

181           The branchial apparatus of hagfish has a unique morphology: the branchial pouch  
182 forms a bladder-shaped structure (bursa branchialis) that connects with the pharynx and external  
183 body through ducts (Marinelli & Strenger, 1956). In *E. burgeri*, we observed six pairs of  
184 hemispherical bursa branchialis lined up on each side (Fig. 4a). The inner gill duct (ductus  
185 branchialis afferens) connects the pharynx and bursa branchialis. The outer gill duct (ductus  
186 branchialis efferens) emerges from the ventral side of the bursa branchialis and is connected to  
187 the branchial pore (Fig. 4a).

188           On the left side of the body, caudal to the caudal-most ductus branchialis efferens, we  
189 identified the ductus oesophageocutanei, a structure unique to hagfish (Fig. 4b). This duct  
190 directly connects the alimentary canal to the exterior of the body at the boundary between the  
191 pharynx and intestine and is located only on the left side. The alimentary canal is slightly  
192 constricted at the branching point of this duct.

193           The heart is located along the midline, caudal to the caudal-most bursa branchialis and  
194 rostral to the liver (Fig. 4b). The heart consists of a ventricle and atrium. The atrium is located  
195 caudal to and on the left side of the ventricle. As in other vertebrates, the ventral aorta extends  
196 anteriorly from the ventricles and leads to the branchial arteries (arteria branchialis afferens) in  
197 each bursa branchialis. The ventral aorta bifurcates around the branching point of the fourth  
198 branchial arteries (Fig. 4b–d), as already reported in *Bdellostoma cirrhatum* (syn. *E. burgeri*) in  
199 Yamatsuta (1903). This differs from the description of *M. glutinosa*, in which the ventral aorta  
200 does not bifurcate and remains along the midline (Marinelli & Strenger, 1956), and from that of  
201 *E. cirrhatum*, in which the ventral aorta bifurcates close to the ventricle (Icardo et al., 2016a, b).

202 The surface of the heart and ventral aorta lacks the vascular system (e.g., coronary or  
203 hypobranchial arteries) seen in many jawed vertebrates (for coronary arteries of jawed  
204 vertebrates, see Mizukami et al., 2022).

205 In unfixed samples (Fig. 4c), the bursa branchialis was easily identifiable as a flexible  
206 gill structure containing small blood vessels. White fat is found around this branchial region,  
207 and the thyroid follicles are embedded in it (Fig. 4d). The thyroid consists of yellow, 100–500-  
208  $\mu\text{m}$  long oval thyroid follicles scattered around the ventral aorta from the anterior part of the  
209 ventricle to the posterior end of the lingual muscle (Fig. 4d).

210

#### 211 **Hepatobiliary and urogenital organs**

212 The hepatobiliary organ is found posterior to the heart. The liver is divided into  
213 anterior and posterior lobes, with the gallbladder located between them (Fig. 5a). The bile duct,  
214 hepatic ducts, blood vessels, and connective tissues are also found between the two lobes and  
215 connect the hepatic organs with the gastrointestinal tract. In unfixed specimens, the gallbladder  
216 was a thin bladder filled with green bile (Fig. 5b). The surface of this bladder is covered with a  
217 network of small arteries. Apart from some large arteries, no vascular networks were visible on  
218 the gallbladder in fixed specimens (Fig. 5c). Although the previous studies have suggested the  
219 presence of a pancreatic principal islet at the junction of the extrahepatic bile duct and intestine  
220 in hagfishes (Youson & Al-Mahrouki, 1999), we could not find this structure in the present  
221 gross dissection. Further histological investigation will be necessary to observe this pancreatic  
222 structure. Spleens were not found.

223 The common bile duct (ductus choledochus) is located between the two liver lobes,  
224 and transports bile from the gallbladder to the intestine (Fig. 5c). From the interface between the  
225 gallbladder and the common bile duct, two hepatic ducts branch off and enter the anterior and  
226 posterior lobes of the liver. These ducts are short, giving the appearance that the gallbladder is

227 attached directly to the liver. The blood vessels on the gallbladder are the peripheral arteries  
228 branched from the coeliac artery (arteria coeliaca) that runs longitudinally along the intestinal  
229 tract. The portal vein (vena portae), a major vein in the liver, bifurcates proximal to the  
230 gallbladder and enters the anterior and posterior lobes of the liver from the same position as the  
231 anterior and posterior hepatic ducts. The posterior branch (v. portae hepatis posterior) passes  
232 near the ventral side of the posterior lobe of the liver. This vein passes out of the liver at the  
233 caudal edge of the posterior lobe and is distributed on the surface of the intestine, where it is  
234 termed the v. subintestinalis. We could not determine the peripheral pattern of v. portae hepatis  
235 anterior in the fixed specimens. In the unfixed specimens, we observed that this vessel branches  
236 all over the medial side (i.e., gallbladder side) of the anterior lobe of the liver (Fig. 5b).

237           The alimentary canal consists of a large simple intestine extending in a straight line  
238 (Fig. 6a). Unlike most jawed vertebrates, hagfish have no stomach. The intestinal tract of *E.*  
239 *burgeri* is a linear structure rich in blood vessels, as has been reported for other hagfishes. The  
240 intestinal wall is thick, elastic, and made up of longitudinally aligned folds on the inner surface  
241 (Fig. 6a).

242           The kidneys are paired on the roof of the body cavity, as in other vertebrates, which  
243 are represented by the pronephros (see Romagnani et al., 2013). The gonads of hagfish are  
244 found in the peritoneal cavity and are attached to the intestinal tract. The testis consists of white-  
245 to cream-colored, translucent tissue (Fig. 6d), and the ovary is yellowish and opaque (Fig. 6b, c).  
246 In the waters around Japan, *E. burgeri* ovarian maturity is reported to occur in September, and  
247 the testes are at their maximum size around July (Patzner, 1978a, b; Nozaki et al., 2000).  
248 However, although we collected the hagfish in February, the gonads were in various stages of  
249 growth (Fig. 6b, c). The membranous ovary contains eggs at various stages of maturity.  
250 Immature eggs appear as small white prolate spheroids that turn yellow and oval as they mature.  
251 Sexual maturity can be confirmed in females by touching the abdomen from the outside.

252

## 253 **Head and brain**

254           The m. parietaris continues serially from the trunk, covering the caudal half of the  
255 head, with the anterior end of this muscle reaching the posterior edge of the corbiculum nasale  
256 (Fig. 7a). The eyes are semi-transparent and easy to observe in the unfixed samples (Fig. 7a); in  
257 the fixed samples, their texture is different and the eyes are more difficult to identify (Fig. 3a).  
258 We needed to remove the m. parietalis when we observed the brain because this muscle covers  
259 the cranial roof. The dorsal surface of the brain is covered with thin cartilage, which must be  
260 removed with scissors for observation of the brain. There is little space between the brain and  
261 the brain capsule (Fig. 7a). The brain consists of the telencephalon, diencephalon,  
262 mesencephalon, and rhombencephalon (Fig. 7b; also see Dupret et al., 2014; Sugahara et al.,  
263 2017; Suzuki, 2021), as in other vertebrates. There is no overt epiphysis. The habenular  
264 ganglion (ganglion habenulae) is located on the midline between the telencephalon and the  
265 diencephalon. On each side of the rhombencephalon is a cartilaginous auditory capsule (capsula  
266 auditiva) with a single-canaled inner ear. This single canal is a derived condition among the  
267 cyclostomes (Higuchi et al., 2019). At the rostral end of the brain, the fila olfactoria enter the  
268 nasal cavity and is closely attached to the corbiculum nasale, making it difficult to detach  
269 without damaging it. Brain texture changed significantly after fixation. Because the brain loses  
270 flexibility and becomes brittle after fixation, isolation of the brain should be performed in the  
271 unfixed condition.

272

273

## 274 **DISCUSSION**

### 275 **Caudal shift of cardiobranchial structures and enlargement of the lingual apparatus**

276           The division of the head and trunk appears to be ambiguous in adult hagfish. Their  
277 bodies are covered with segmented m. parietalis up to the area surrounding the brain, and the  
278 branchial pores open at about the middle of the body. This should be related to two  
279 developmental processes: the caudal shift of the pharyngeal structures and the rostral shift of the  
280 trunk somite derivatives, as observed in the development of *E. burgeri* (see Oisi et al., 2015).

281           The vertebrate heart is originally a structure closely associated with the pharyngeal  
282 arch, and the head mesoderm and cranial neural crest cells contribute to it during the pharyngula  
283 stage (Tzahor & Evans, 2011; Meilhac & Buckingham, 2018). Because of this, the heart is  
284 located in the head near the pharynx in most fishes, but adults of some tetrapod groups are the  
285 exception. A typical example is amniotes, in which the heart shifts caudally to the thorax during  
286 development, away from the cranium, to establish a long neck (Hirasawa et al., 2016). This  
287 translocation of the heart during the establishment of a long neck results in the heart being  
288 surrounded by trunk derivatives, such as the rib cage.

289           The caudal shift of the branchial and heart region in hagfishes differs from the  
290 translocation of the heart in amniotes. In jawed vertebrates, the mandibular arch differentiates  
291 into the jaw and the hyoid arch into the hyoid apparatus and cutaneous muscles of the neck.  
292 They are rarely remodeled, whether the neck is long or not. Remodeling occurs instead in the  
293 caudal-most part of the pharyngeal arch series, resulting in the extension of the esophagus  
294 behind the caudal-most pharynx, giving rise to a long neck. By contrast, in the hagfishes,  
295 elongation occurs in the rostral pharynx. The fourth pharyngeal pouches as well as more caudal  
296 ones differentiate as simple branchial pores and shift caudally with the heart following the  
297 remodeling of the first through third pharyngeal arches (Oisi et al., 2015). Thus, the anterior part  
298 of the pharynx, not the esophagus, is elongated in hagfishes without establishing a neck.  
299 Simultaneously, the trunk somites shift rostrally to cover the head surface (Oisi et al., 2015).  
300 This is also an important difference from jawed vertebrates, whose necks are characterized by  
301 cucullaris muscles (Oisi et al., 2015 and references therein).

302           This rostral extension of the somites is also found in lampreys (Kuratani et al., 1999),  
303 suggesting that the presence of trunk muscles surrounding the heart is common to all adult  
304 cyclostomes. In lampreys, however, the translocation of the cardiobranchial region does not  
305 occur. A large lingual apparatus occupies the space between the cranium and the branchial  
306 region in hagfishes (Fig. 3), whereas the lingual apparatus is smaller and located on the ventral  
307 side of the branchial region in lampreys (Marinelli & Strenger, 1954; Yalden, 1985). Thus, the  
308 shift in cardiobranchial position could be related to the enlargement of the lingual apparatus, a  
309 derivative of the mandibular arch. It is unclear which morphology, that of the lamprey or  
310 hagfish, more closely reflects the ancestral form of the cyclostomes. In †*Myxinikela siroka* and  
311 †*Tethymyxine tapirostrum*, which are regarded as close relatives of hagfish, the gills are much  
312 more cephalic in position than in the extant hagfishes (Bardack, 1991; Miyashita et al., 2019).  
313 Therefore, perhaps the enlargement of the lingual apparatus and the caudal shift of the  
314 cardiobranchial systems in the extant hagfishes is a derivative condition.

315

### 316 **Hagfish have unique diversities in the branchial region**

317           *Myxine* and *Eptatretus* differ considerably in their external morphology in that the  
318 former group has a single pair of branchial pore apertures and the latter has multiple pairs. In  
319 *Myxine*, multiple ductus branchialis efferens open into a single branchial pore. In *Eptatretus*,  
320 each ductus branchialis efferens opens into a single branchial pore, which is thought to be the  
321 ancestral pattern (Jørgensen et al., 1998).

322           The number of bulsa branchialis and branchial pores varies throughout the  
323 Myxinoidean lineage. In *Eptatretus*, the number of bulsa branchialis has been reported to range  
324 from 5 to 14 pairs (Dean, 1904; Mincarone & McCosker, 2004). This not only varies among  
325 species but can also vary within a species. For example, in *Eptatretus stoutii* (syn. *Homea*  
326 *stoutii*), the number of gill pairs is usually 12 but can range from 10 to 15 (Dean, 1904). In

327 *Myxine*, the number of bulsa branchialis does not vary as much as in *Eptatretus*, and ranges  
328 from five to seven pairs (Jørgensen et al. 1998). The cretaceous †*Tethymyxine tapirostrum* has  
329 eight pairs of bulsa branchialis (Miyashita et al., 2019).

330           In addition, perhaps related to the diversity of gill arch organs, there is also diversity in  
331 the branching pattern of the ventral aorta among hagfishes. In the *E. burgeri* specimens  
332 dissected in the present study, the ventral aorta branches in a “Y” pattern about a third of the  
333 way from the ventricle. In contrast, in *M. glutinosa*, the ventral aorta is unbranched and “I-  
334 shaped,” as in extant chondrichthyans (Marinelli & Strenger, 1956). This bifurcating structure in  
335 *E. burgeri* is identical to that of *E. stoutii* (Müller, 1834), but different from *E. cirrhatus* in  
336 which the ventral aorta bifurcates near the ventricle (Icardo et al., 2016a; see also Dean, 1904).

337           In contrast to the diversity in the branchial apparatus among the extant hagfish, all  
338 extant lampreys have seven bulsa branchialis and seven corresponding branchial pores, with less  
339 morphological diversity within the extant species than the hagfish. Although the morphology is  
340 uncertain in some extinct species, such as †*Hardistiella montanensis*, the Carboniferous  
341 †*Mayomyzon pieckoensis* has seven pairs of gills (Bardack, 1991; Miyashita et al., 2021 and  
342 references therein), indicating that the past diversity of lampreys might also have been much  
343 smaller than that of the extant hagfishes.

344           Similarly, whereas some hagfish species have a variable number of pharyngeal arches,  
345 all extant gnathostomes have a fixed number of pharyngeal arches. What allowed the deviation  
346 in the hagfish lineage from the developmental constraint that fixes the number of pharyngeal  
347 arches in other vertebrate taxa is unknown. It might have something to do with the development  
348 of the massive lingual apparatus, accompanied by a caudal shift of the branchial apparatus  
349 throughout development. Perhaps, the developmental process and time may have a redundancy  
350 in response to the extreme environment of the deep sea, and the number of gills might be  
351 affected by developmental adaptations to different marine environments.

352           In addition to their true heart (sometimes called the branchial heart), hagfish have  
353 multiple “accessory hearts” (Johansen, 1963; Nishiguchi et al., 2016). The significance and  
354 function of these accessory hearts are unknown, although some authors have suggested that they  
355 enable the storage of more than 30% of their blood in the sinus system to keep blood pressure  
356 low and ensure gill function (Forster, 1997). The number and locations of these accessory hearts  
357 are also known vary among species. For example, *M. glutinosa* has two cardinal hearts, one  
358 branchial heart, one portal heart, and one pair of caudal hearts, but *E. okinoseanus* does not have  
359 caudal hearts (Nishiguchi et al., 2016). In addition, hagfish maintain a lower blood pressure than  
360 other vertebrates, especially among the *Myxine* (Farrell, 2007). In hagfish living in deep-sea  
361 environments, the gill and cardiovascular systems appear to have been optimized for circulation  
362 at low blood pressure to maximize efficiency.

363

#### 364 **Thyroid gland**

365           The thyroid gland of the cyclostomes is not a glandular organ with clusters of follicles,  
366 but rather, the thyroid follicles are scattered throughout the pharynx (Kobayashi, 1987). Hagfish  
367 thyroid follicles are similar in early development and morphology to those of gnathostomes and  
368 represent the ancestral condition among extant vertebrates (Takagi et al., 2022). Electron  
369 microscopic analyses have revealed the presence of dense granules in the thyroid follicular  
370 epithelial cells of hagfishes, which are thought to contain iodine (Henderson & Gorbman, 1971;  
371 Fujita, 1975; Fujita & Shinkawa, 1975; Suzuki, 1985). Also, numerous microvilli are present on  
372 the apical membrane on the medial side of the follicular structure of thyroid follicular epithelial  
373 cells [ > Also, numerous microvilli are present on the apical (luminal) membrane of thyroid  
374 follicular epithelial cells] (Suzuki and Kawabata, 1988). These observations indicate that the  
375 thyroid follicles of hagfish do not differ significantly from those of other vertebrates in terms of  
376 histology.



377           In lampreys, the thyroid gland takes on the function of an exocrine organ, known as an  
378 endostyle, during the larval period. This was long considered to be an ancestral condition, but  
379 recently it has been suggested to be a secondary condition (Takagi et al., 2022). Although there  
380 is some difference in the arrangement of blood vessels, both lamprey and hagfish have the  
381 scattered distribution of thyroid follicles along the bifurcated ventral aorta (for lamprey, see  
382 Takagi et al., 2022). This suggests that the ancestral thyroid gland was composed of scattered  
383 follicles, at least in the common ancestor of the cyclostomes, and that the thyroid as a glandular  
384 organ arose for the first time in the gnathostome lineage. A similar trend is seen in the pancreas,  
385 as discussed below.

386

### 387 **Hagfishes possess an ancestral-type hepatobiliary system**

388           Morphological evolutionary studies of the hepatobiliary organs are less well-  
389 established than those of other body systems, such as the musculoskeletal system. Because of  
390 this, evolutionary studies of the hepatobiliary system are poorly developed, even though it is a  
391 characteristic structure of vertebrates.

392           The hepatobiliary system of the lamprey is distinct from that of jawed vertebrates, for  
393 example in having a single liver lobe (Marinelli & Strenger, 1954). Some older studies have  
394 claimed that the gallbladder is completely absent in lampreys, but this is incorrect; the  
395 gallbladder is present during the ammocoetes larval period and is lost in the adult stage  
396 (Scammon, 1916; Youson & Sidon, 1978; Youson, 1993; Morii et al., 2010). This degeneration  
397 of the gallbladder during metamorphosis is unique to lampreys. In this respect, adult lampreys  
398 are more specialized than their ammocoetes larvae.

399           In contrast to lampreys, the hepatobiliary organs of hagfish resemble those of jawed  
400 vertebrates at the gross anatomical level. For example, hagfish maintain two liver lobes and a  
401 large gallbladder throughout their lives (Fig. 5). Because of their elongated shape, the liver

402 lobes are generally called anterior and posterior lobes, which correspond to the right and left  
403 lobes, respectively, of other vertebrates. The gallbladder is supplied by vessels branching from  
404 the artery of the body cavity (a. hepatica). The major veins of the liver gather in the vena  
405 portaea and enter the heart through a short route through the sinus venosus. The topographical  
406 relationships among the major veins are identical to those of mammals (Higashiyama et al.,  
407 2016) and birds (Higashiyama & Kanai, 2021), but distinct from those of lampreys. Thus, the  
408 hepatobiliary morphology is highly conserved among the vertebrates, and the lamprey case is  
409 likely to be a derived form.

410           Histologically, the hepatobiliary system of hagfish resembles that of jawed vertebrates,  
411 although with some important differences. Namely, in both hagfish and jawed vertebrates, the  
412 intrahepatic bile ducts and hepatic artery run parallel to the portal vein to form portal triads, and  
413 smooth muscle is distributed around the hepatic artery and gallbladder (Umezu et al., 2012;  
414 Shiojiri et al., 2019; Ota et al., 2021). However, it has recently been reported that in hagfish,  
415 both the intrahepatic and extrahepatic bile ducts and the portal vein lack smooth muscle layers.  
416 These characteristics have not been found in jawed vertebrates as far as is known (Ota et al.,  
417 2021).

418           Whereas lamprey and hagfish differ in the structure of their liver and bile ducts, both  
419 taxa are characterized by their lack of a compact pancreas (pancreatic organ). In extant  
420 mammals, the pancreas develops from the subdivision of a single embryonic primordium (the  
421 hepatic diverticulum) (Higashiyama et al., 2018), but this primordium is probably not present in  
422 cyclostomes. The exo- and endocrine cells exist sparsely in the intestinal wall (Yui et al., 1988;  
423 Youson & Al-Mahrouki, 1999), and could not be identified in our examination of gross anatomy.  
424 Thus, as with the thyroid, the pancreas as an organ as well as the pancreatic duct likely arose in  
425 the common ancestor of the jawed vertebrates, although we cannot exclude the possibility that  
426 the compact pancreas was lost secondarily in the common ancestor of the cyclostomes. Detailed  
427 embryological data is needed to provide further insight into this question.

428

## 429 **Conclusion**

430 We dissected specimens of *E. burgeri* and compared its gross morphology, mainly around the  
431 pharynx, with that of other species. We identified several morphological differences between *E.*  
432 *burgeri* and other species in the pharyngeal region and the cardiovascular system but were not  
433 able to do so for other organs.

434 We did not conduct a detailed dissection of the musculoskeletal or nervous systems.  
435 Some differences in these systems could be tied to differences in ecology among hagfish species.  
436 For example, the eyes of *Myxine* are almost completely buried beneath the cutaneous layer  
437 (Marinelli & Strenger, 1956), whereas the position of the eyes can be identified externally in  
438 *Eptatretus*. It is plausible that there are differences in the shape of the brain and peripheral  
439 nerves associated with these sensory-organ differences. Comparison of the two sub-lineages will  
440 allow for a better understanding of hagfish evolution and development.

441 In the present study, we examined the anatomy of unfixed and fixed hagfish specimens.  
442 Although fixed specimens allow detailed observation of various body structures, the texture and  
443 color of each tissue are lost. In addition, sampling of the soft tissues, such as the thyroid gland  
444 and brain, is often performed under unfixed conditions. Therefore, the comparative dissection of  
445 unfixed and fixed specimens, herein described with photographs, should serve as a guide for  
446 future studies.

447

448

## 449 **Acknowledgments**

450 We appreciate Hisashi Hasegawa and Kazutaka Hasegawa (Choukane Maru; Yaizu City,  
451 Shizuoka, Japan) providing the *E. atami* specimens and Hisanori Kohtsuka (Misaki Marine  
452 Station, the University of Tokyo) and Susumu Hatanaka (Shinsho Maru; Fujisawa, Kanagawa,  
453 Japan) providing the *E. burgeri* specimens. We are grateful to Kohei Kotake (Graduate School

454 of Science, Shizuoka University) and Kazuma Nishio (Graduate School of Science, Shizuoka  
455 University) for their assistance in the dissection, and Kanako Sugawara (Graduate School of  
456 Science, Kyoto University) for providing the photograph of *E. burgeri* with exposed teeth in  
457 Figure 2. We also thank Dr. Hiroki Gotoh (Faculty of Science, Shizuoka University) for  
458 bringing us together and giving us the opportunity to write this research paper.

459

#### 460 **Author contributions**

461 B.M. designed research; B.M., D.G.S., and H.H. performed research; B.M.,  
462 D.G.S., M.S., and H.H. analyzed data; B.M. and H.H. write the draft manuscript; and  
463 B.M., D.G.S., M.S., and H.H. reviewed and edited the manuscript.

464

465

#### 466 **References**

- 467 Bardack, D. (1991). First fossil hagfish (Myxinoidea): a record from the Pennsylvanian of  
468 Illinois. *Science* 254, 701-703.
- 469 Clark, A.J., & Summers, A.P. (2007) Morphology and kinematics of feeding in hagfish:  
470 possible functional advantages of jaws. *J Exp Biol* 210, 2897-3909.
- 471 Cole, F.J. (1907). XXVI.—A monograph on the general morphology of the myxinoid fishes,  
472 based on a study of *Myxine*. part II. The anatomy of the muscles. *Earth and Environmental*  
473 *Science Transactions of The Royal Society of Edinburgh* 45, 683-757.
- 474 Dean, B. (1904). Notes on Japanese Myxinoids: a new genus *Paramyxine*, and a new species  
475 *Homea okinoseana*, reference also to their eggs. *The journal of the College of Science,*  
476 *Imperial University of Tokyo, Japan* 19, 1-23.
- 477 Denisenko, E., Guo, B.B., Jones, M., Hou, R., De Kock, L., Lassmann, T., Poppe, D., Clément,  
478 O., Simmons, R.K., Lister, R., & Forrest, A.R. (2020). Systematic assessment of tissue  
479 dissociation and storage biases in single-cell and single-nucleus RNA-seq workflows.  
480 *Genome Biology* 21, 1-25.
- 481 Dong, E.M., & Allison, W.T. (2021). Vertebrate features revealed in the rudimentary eye of the  
482 Pacific hagfish (*Eptatretus stoutii*). *Proc Biol Sci* 288, 20202187.
- 483 Dupret, Y., Sanchez, S., Goujet, D., Tafforeau, P., & Ahlberg, P.E. (2014). A primitive  
484 placoderm sheds light on the origin of the jawed vertebrate face. *Nature* 507, 500-503.

- 485 Farrell, A.P. (2007). Cardiovascular systems in primitive fishes. *Fish Physiology* 26, 53-120.
- 486 Forster, M.E. (1997). The blood sinus system of hagfish: its significance in a low-pressure  
487 circulation. *Comparative Biochemistry and Physiology Part A: Physiology* 116, 239-244.
- 488 Fricke, R., Eschmeyer, W.N., & Van der Laan, R. (eds) (2022). Eschmeyer's catalog of fishes:  
489 genera, species, references.  
490 (<http://researcharchive.calacademy.org/research/ichthyology/catalog/fishcatmain.asp>).  
491 Electronic version accessed 25 October 2022.
- 492 Fujita, H. (1975). X-ray microanalysis on the thyroid follicle of the hagfish, *Eptatretus burgeri*  
493 and lamprey, *Lampetra japonica*. *Histochemistry* 43, 283-290.
- 494 Fujita, H., Shinkawa, Y. (1975). Electron microscopic studies on the thyroid gland of the  
495 hagfish, *Eptatretus burgeri*. (a part of phylogenetic studies on the thyroid gland). *Arch*  
496 *Histol Jap* 37, 277-289.
- 497 Gabbott, S.E., Donoghue, P.C.J., Sansom, R.S., Vinther, J., Dolocan, A., & Purnell, M.A.  
498 (2016). Pigmented anatomy in Carboniferous cyclostomes and the evolution of the  
499 vertebrate eye. *Proc R Soc B*. 283, 20161151.
- 500 Gorbman, A., Kobayashi, H., Honma, Y., & Matsuyama, M. (1990). The hagfishery of Japan.  
501 *Fisheries* 15, 12-18.
- 502 Heimberg, A. M., Cowper-Sal-lari, R., Sémon, M., Donoghue, P. C., & Peterson, K. J. (2010).  
503 microRNAs reveal the interrelationships of hagfish, lampreys, and gnathostomes and the  
504 nature of the ancestral vertebrate. *Proceedings of the National Academy of Sciences*  
505 107(45), 19379-19383.
- 506 Henderson, N.E., Gorbman, A. (1971). Fine structure of the thyroid follicle of the Pacific  
507 hagfish, *Eptatretus stouti*. *Gen Comp Endocrinol* 16, 409-429.
- 508 Higashiyama, H., Sumitomo, H., Ozawa, A., Igarashi, H., Tsunekawa, N., Kurohmaru, M., &  
509 Kanai, Y. (2016). Anatomy of the murine hepatobiliary system: A whole-organ-level  
510 analysis using a transparency method. *Anat Rec (Hoboken)* 299, 161-172.
- 511 Higashiyama, H., Uemura, M., Igarashi, H., Kurohmaru, M., Kanai-Azuma, M., & Kanai, Y.  
512 (2018). Anatomy and development of the extrahepatic biliary system in mouse and rat: a  
513 perspective on the evolutionary loss of the gallbladder. *J Anat* 232, 134-145.
- 514 Higashiyama, H., & Kanai, Y. (2021). Comparative anatomy of the hepatobiliary systems in  
515 quail and pigeon, with a perspective for the gallbladder-loss. *J Vet Med Sci* 83, 855-862.

- 516 Higuchi, S., Sugahara, F., Pascual-Anaya, J., Takagi, W., Oisi, Y., & Kuratani, S. (2019). Inner  
517 ear development in cyclostomes and evolution of the vertebrate semicircular canals. *Nature*  
518 565, 347-350.
- 519 Hirasawa, T., Fujimoto, S., & Kuratani, S. (2016). Expansion of the neck reconstituted the  
520 shoulder–diaphragm in amniote evolution. *Development, Growth & Differentiation* 58,  
521 143-153.
- 522 Honma, Y. (1998). Asian hagfishes and their fisheries biology. In *The biology of hagfishes* (pp.  
523 45-56). Springer, Dordrecht.
- 524 Icardo, J.M., Colvee, E., Schorno, S., Lauriano, E.R., Fudge, D.S., Glover, C.N., & Zaccone, G.  
525 (2016a). Morphological analysis of the hagfish heart. I. The ventricle, the arterial  
526 connection and the ventral aorta. *J Morphol* 277, 326-340.
- 527 Icardo, J.M., Colvee, E., Schorno, S., Lauriano, E.R., Fudge, D.S., Glover, C.N., & Zaccone, G.  
528 (2016b). Morphological analysis of the hagfish heart. II. The venous pole and the  
529 pericardium. *J Morphol* 277, 853-865.
- 530 Janvier P. (1996). *Early Vertebrates*. Oxford: Oxford University Press pp. 393
- 531 Johansen, K. (1963). The cardiovascular system of *Myxine glutinosa*. In: Brodal A, Fänge R,  
532 editors. *The biology of Myxine*, Oslo: Universitetsforlaget. p 289-316.
- 533 Jørgensen, J.M., Lomholt, J.P., Weber, R.E., & Malte, H. (1998). *The Biology of Hagfishes*,  
534 Springer Dordrecht, pp34-35.
- 535 Kase, M., Shimizu, T., Kamino, K., Umetsu, K., Sugiyama, H., & Kitano, T. (2017). Brown  
536 hagfish from the northwest and east coasts of Honshu, Japan are genetically different.  
537 *Genes Genet Syst* 92, 197-203.
- 538 Kuraku, S., Hoshiyama, D., Katoh, K., Suga, H., & Miyata, T. (1999). Monophyly of lampreys  
539 and hagfishes supported by nuclear DNA–coded genes. *Journal of Molecular Evolution* 49,  
540 729-735.
- 541 Kuraku, S., & Kuratani, S. (2006). Time scale for cyclostome evolution inferred with a  
542 phylogenetic diagnosis of hagfish and lamprey cDNA sequences. *Zoological Science* 23,  
543 1053-1064.
- 544 Kuraku, S. (2008). Insights into cyclostome phylogenomics: pre-2R or post-2R. *Zoological*  
545 *Science*, 25, 960-968.
- 546 Kuratani, S., Horigome, N., & Hirano, S. (1999). Developmental morphology of the head

- 547 mesoderm and reevaluation of segmental theories of the vertebrate head: evidence from  
548 embryos of an agnathan vertebrate, *Lampetra japonica*. *Dev Biol* 210, 381-400.
- 549 Li, P., Conley, A., Zhang, H., & Kim, H.L. (2014). Whole-transcriptome profiling of formalin-  
550 fixed, paraffin-embedded renal cell carcinoma by RNA-seq. *BMC genomics* 15, 1-9.
- 551 Mallatt, J., & Sullivan, J. (1998). 28S and 18S rDNA sequences support the monophyly of  
552 lampreys and hagfishes. *Molecular Biology and Evolution* 15, 1706-1718.
- 553 Marinelli, W., & Strenger, A. (1954). *Vergleichende Anatomie und Morphologie der*  
554 *Wirbeltiere, Band 1. Lampetra fluviatilis*. Franz Deuticke, Wien.
- 555 Marinelli, W., & Strenger, A. (1956). *Vergleichende Anatomie und Morphologie der*  
556 *Wirbeltiere Band 2. Myxine glutinosa*. Franz Deuticke, Wien.
- 557 Meilhac, S.M., & Buckingham, M.E. (2018). The deployment of cell lineages that form the  
558 mammalian heart. *Nat Rev Cardiol* 15, 705-724.
- 559 Mincarone, M.M., & McCosker, J.E. (2004). *Eptatretus lakeside* sp. nov., a new species of five-  
560 gilled hagfish (myxinidae) from the Galápagos islands. *Reprinted from PCAS* 55, 162–168.
- 561 Miyashita, T., Coates, M.I., Farrar, R., Larson, P., Manning, P.L., Wogelius R.A., Edwards,  
562 N.P., Anné, J., Bergmann, U., Palmer, A.R., & Currie, P.J. (2019). Hagfish from the  
563 Cretaceous Tethys Sea and a reconciliation of the morphological–molecular conflict in  
564 early vertebrate phylogeny. *PNAS* 116, 2146-2151.
- 565 Miyashita, T., Gess, R.W., Tietjen, K., & Coates, M.I. (2021). Non-ammocoete larvae of  
566 Palaeozoic stem lampreys. *Nature* 591, 408-412.
- 567 Mizukami, K., Higashiyama, H., Arima, Y., Ando, K., Fukuhara, S., Miyagawa-Tomita, S., &  
568 Kurihara, H. (2022). Coronary artery established through amniote evolution. *bioRxiv*. doi:  
569 <https://doi.org/10.1101/2022.09.06.506796>
- 570 Morii, M., Mezaki, Y., Yamaguchi, N., Yoshikawa, K., Miura, M., Imai, K., Yoshino, H.,  
571 Hebiguchi, T., & Senoo, H. (2010). Onset of apoptosis in the cystic duct during  
572 metamorphosis of a Japanese lamprey, *Lethenteron reissneri*. *Anat Rec* 293, 1155-1166.
- 573 Müller, J. (1834). Vergleichende Anatomie der Myxinoiden, der Cyclostomen mit durchbortem  
574 gaumen. I. Osteologie und myologie. *Abhandlungen der königlichen Akademie der*  
575 *Wissenschaften zu Berlin*. Wiss Berlin. pp. 65–340.
- 576 Nakabō, T. (Ed.). (2013). *Fishes of Japan: with pictorial keys to the species*, third edition.  
577 Tokyo: Tokai University Press.

- 578 Nelson, J.S., Grande, T.C., & Wilson, M.V. (2016). *Fishes of the World*. John Wiley & Sons.
- 579 Nishiguchi, Y., Tomita, T., Sato, K., Yanagisawa, M., Murakumo, K., Kamisako, H., Kaneko,  
580 A., Hiruta, N., Terai, K., Takahara, A., & Okada, M. (2016). Examination of the hearts and  
581 blood vascular system of *Eptatretus okinoseanus* using computed tomography images,  
582 diagnostic sonography, and histology. *Int J Anal Bio-Sci* 4, 46-54.
- 583 Nozaki, M., Ichikawa, T., Tsuneki K., & Kobayashi, H. (2000). Seasonal development of  
584 gonads of the hagfish, *Eptatretus burgeri*, correlated with their seasonal migration. *Zoolog*  
585 *Sci* 17, 225-232.
- 586 Oisi, Y., Ota, K.G., Kuraku, S., Fujimoto, S., & Kuratani, S. (2013). Craniofacial development  
587 of hagfishes and the evolution of vertebrates. *Nature* 493, 175-180.
- 588 Oisi, Y., Fujimoto, S., Ota, K.G., & Kuratani, S. (2015). On the peculiar morphology and  
589 development of the hypoglossal, glossopharyngeal and vagus nerves and hypobranchial  
590 muscles in the hagfish. *Zoological Letters* 1, 1-15.
- 591 Ota, K.G., Kuraku, S., & Kuratani, S. (2007). Hagfish embryology with reference to the  
592 evolution of the neural crest. *Nature* 446, 672-675.
- 593 Ota, K.G., Fujimoto, S., Oisi, Y., & Kuratani, S. (2011). Identification of vertebra-like elements  
594 and their possible differentiation from sclerotomes in the hagfish. *Nat Commun* 2, 373.
- 595 Ota, N., Hirose, H., Kato, H., Maeda, H., & Shiojiri, N. (2021). Immunohistological analysis on  
596 distribution of smooth muscle tissues in livers of various vertebrates with attention to  
597 different liver architectures. *Annals of Anatomy-Anatomischer Anzeiger* 233, 151594.
- 598 Patzner, R.A. (1978a). Cyclical changes in the testis of the hagfish *Eptatretus burgeri*  
599 (Cyclostomata). *Acta Zool.* 58, 223-226.
- 600 Patzner, R.A. (1978b). Cyclical changes in the ovary of the hagfish *Eptatretus burgeri*  
601 (Cyclostomata). *Acta Zool.* 59, 57-61.
- 602 Romagnani, P., Lasagni, L., & Remuzzi, G. (2013). Renal progenitors: an evolutionary  
603 conserved strategy for kidney regeneration. *Nat Rev Nephrol* 9, 137-146.
- 604 Scammon R.E. (1916). On the development of the biliary system in animals lacking a  
605 gallbladder in postnatal life. *The Anatomical Record* 10, 543-558.
- 606 Shiojiri, N., Tanaka, S., & Kawakami, H. (2019). The hepatic architecture of the coelacanth  
607 differs from that of the lungfish in portal triad formation. *Okajimas Folia Anatomica*  
608 *Japonica* 96, 1-11.



- 609 Sugahara, F., Murakami, Y., Pascual-Anaya, J., & Kuratani, S. (2017). Reconstructing the  
610 ancestral vertebrate brain. *Dev Growth Differ* 59, 163-174.
- 611 Sugahara, F. (2021). Cyclostomes (Lamprey and Hagfish). In: Schierwater, B. & Boutet, A., eds.  
612 *Handbook of Marine Model Organisms in Experimental Biology*. CRC Press: Boca Raton.  
613 pp. 403-417.
- 614 Suzuki, D.G. (2021). Consciousness in jawless fishes. *Frontiers in Systems Neuroscience* 15,  
615 751876.
- 616 Suzuki, S. (1985). Iodine distribution in the thyroid follicles of the hagfish, *Eptatretus burgeri*  
617 and lamprey, *Lampetra japonica*: Electron-probe X-ray microanalysis. *Cell Tissue Res* 241,  
618 539-543.
- 619 Suzuki, S. (1992). 4 Thyroid gland. In: Matsumoto, A., Ishii, S., eds. *Atlas of Endocrine*  
620 *Organs: Vertebrates and Invertebrates*, Springer: Berlin. pp. 63-71.
- 621 Suzuki, S., & Kawabata, I. (1988). A scanning electron microscopic study on the thyroid follicle  
622 of the hagfish *Eptatretus burgeri*. *Acta Zool* 69, 253-258.
- 623 Takagi, W., Sugahara, F., Higuchi, S., Kusakabe, R., Pascual-Anaya, J., Sato, I., Oisi, Y.,  
624 Ogawa, N., Miyanishi, H., Adachi, N., Hyodo, S., & Kuratani, S. (2022). Thyroid and  
625 endostyle development in cyclostomes provides new insights into the evolutionary history  
626 of vertebrates. *BMC biology* 20, 1-10.
- 627 Takezaki, N., Figueroa, F., Zaleska-Rutczynska, Z., & Klein, J. (2003). Molecular phylogeny of  
628 early vertebrates: monophyly of the agnathans as revealed by sequences of 35 genes.  
629 *Molecular Biology and Evolution* 20, 287-292.
- 630 Tzahor, E., & Evans, S.M. (2011). Pharyngeal mesoderm development during embryogenesis:  
631 implications for both heart and head myogenesis. *Cardiovasc Res* 91, 196-202.
- 632 Umezu, A., Kametani, H., Akai, Y., Koike, T., & Shiojiri, N. (2012). Histochemical analyses of  
633 hepatic architecture of the hagfish with special attention to periportal biliary structures.  
634 *Zoolog Sci* 29, 450-457.
- 635 Yalden, D.W. (1985). Feeding mechanisms as evidence for cyclostome monophyly. *Zoological*  
636 *Journal of the Linnean Society* 84, 291-300.
- 637 Yamatsuta, K. (1903). The anatomy of *Bdellostoma cirrhatum*, Gthr. *Bulletin of Tōkyō Kōtō*  
638 *Shihan Gakkō Hakubutsu Gakkai* 1, 1-3. (in Japanese)
- 639 Yokoyama, H., Yoshimura, M., Suzuki, D.G., Higashiyama, H. & Wada, H. (2021).

- 640           Development of the lamprey velum and implications for the evolution of the vertebrate jaw.  
641           *Dev Dyn* 250, 88-98.
- 642    Youson, J., & Sidon, E. (1978). Lamprey biliary atresia: First model system for the human  
643           condition? *Cellular and Molecular Life Sciences* 34, 1084-1086.
- 644    Youson, J.H. (1993). Biliary atresia in lampreys. *Adv Vet Sci Comp Med* 37, 197-255.
- 645    Youson, J.H., & Al-Mahrouki, A.A. (1999). Ontogenetic and phylogenetic development of the  
646           endocrine pancreas (islet organ) in fish. *Gen Comp Endocrinol* 116, 303-335.
- 647    Yui, R., Nagata, Y., & Fujita, T. (1988). Immunocytochemical studies on the islet and the gut of  
648           the arctic lamprey, *Lampetra japonica*. *Arch Histol Cytol* 51, 109-119.
- 649    Ziermann, J.M., Miyashita, T., & Diogo, R. (2014). Cephalic muscles of Cyclostomes  
650           (hagfishes and lampreys) and Chondrichthyes (sharks, rays and holocephalans):  
651           comparative anatomy and early evolution of the vertebrate head muscles. *Zool J Linn Soc-*  
652           *Lond* 172, 771-802.

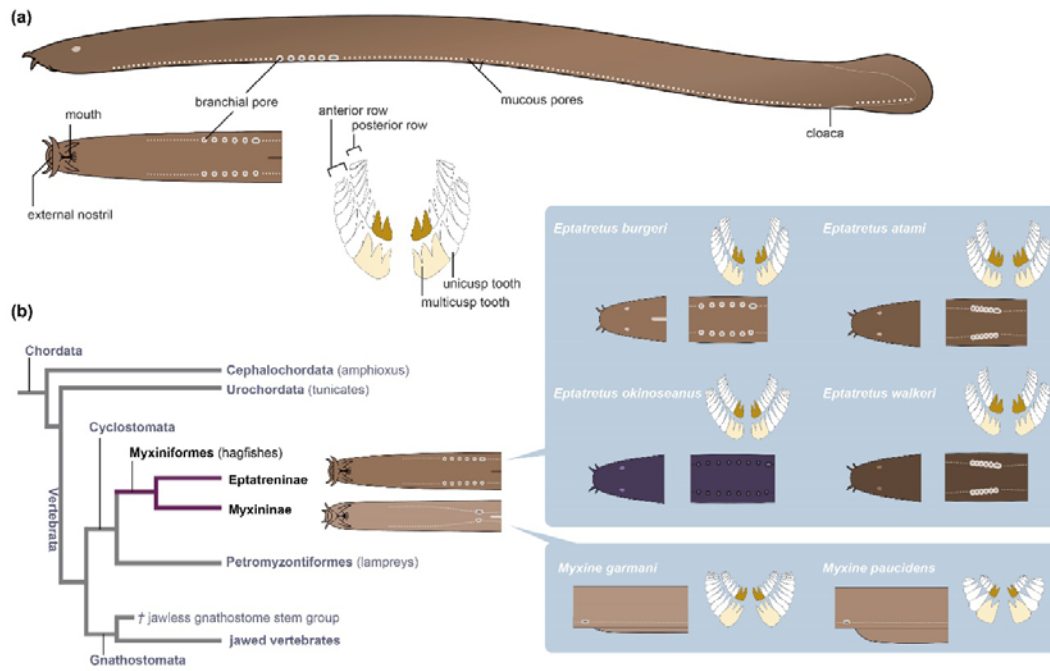

653

654 **FIGURE 1** Morphological variation among hagfishes and their phylogenetic relationships. (a)  
655 Diagram of a hagfish, showing a left lateral view of the entire body, a ventral view of the head,  
656 and the tooth arrangement. (b) Phylogenetic relationships among the chordates. The  
657 Myxiniformes contain two lineages: Eptatretinae and Myxiniinae. The Eptatretinae have several  
658 pairs of external branchial pores, and the Myxiniinae have a single pair of branchial pores  
659 (Nelson et al., 2016). The morphological diagrams are after Nakabō (2013).

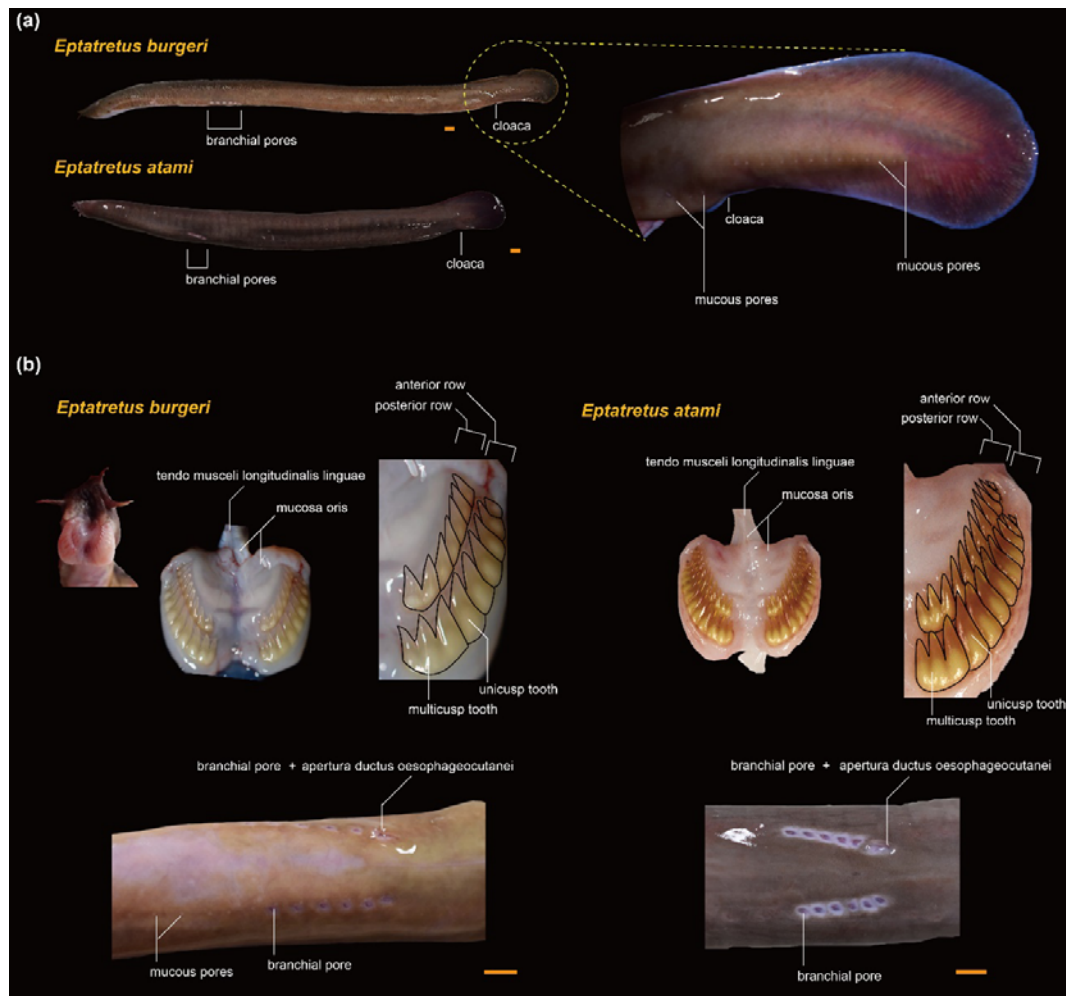

660

661 **FIGURE 2.** The external morphology of two hagfish species, *Eptatretus burgeri* and *E. atami*.  
662 (a) Photographs of each species, showing an enlarged view of the caudal part of *E. burgeri*. (b)  
663 Differences between the two species in the arrangement of tooth rows and external branchial  
664 pores. Scale bars = 1 cm.

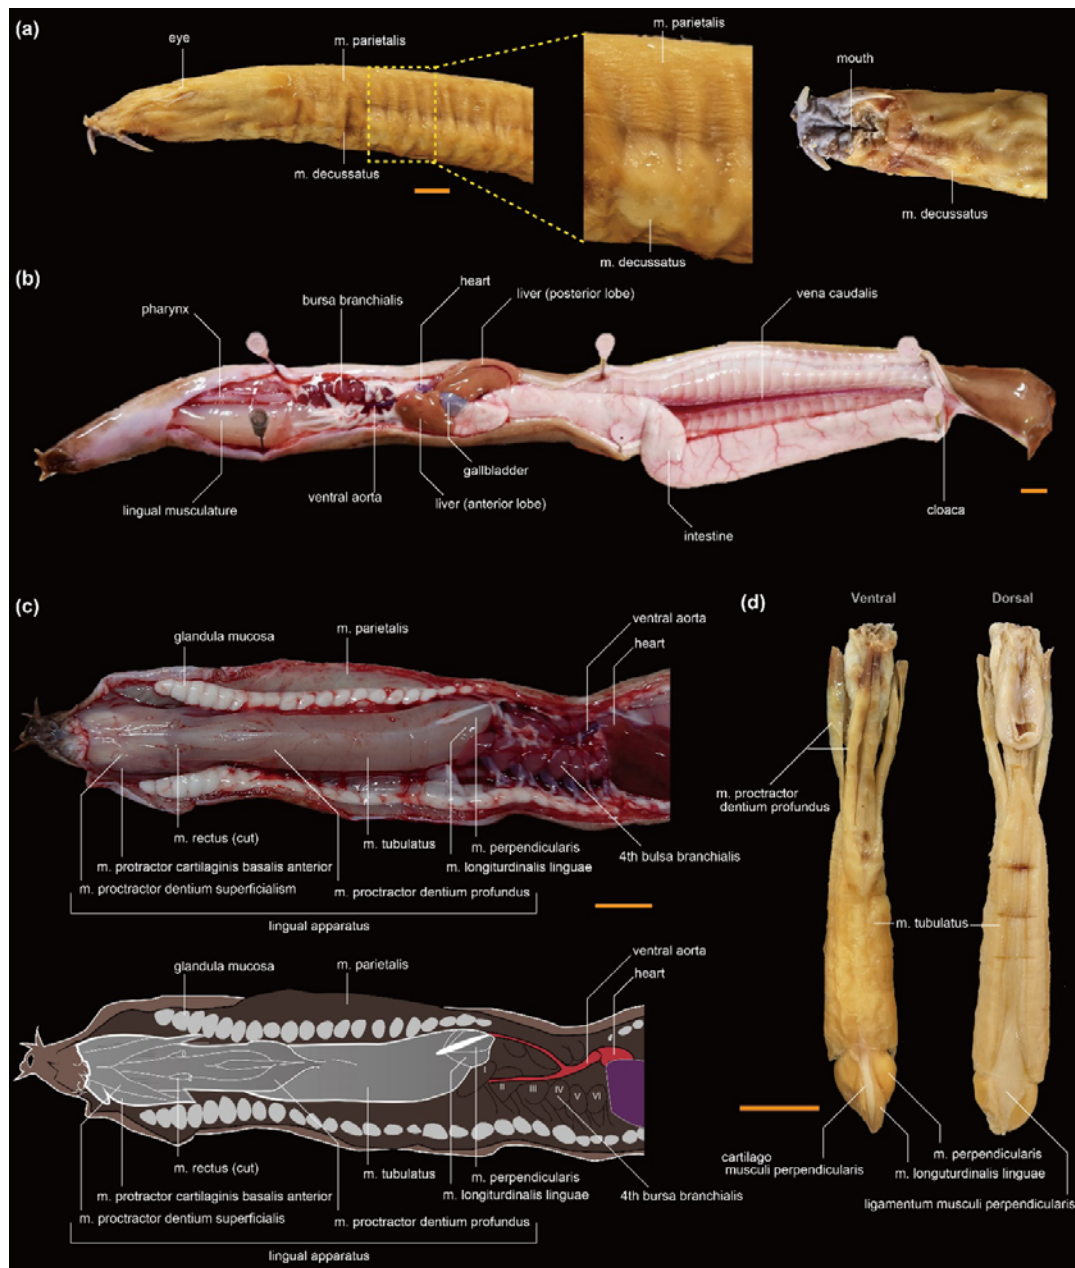

665

666 **FIGURE 3.** Positions of the organs and lingual apparatus of *Eptatretus burgeri*. (a) Fixed  
 667 specimen with skin removed. The trunk is covered by two muscles with different fiber  
 668 directions. (b) We cut and opened the body wall muscle using an unfixed specimen to show the  
 669 lingual apparatus and internal organs. The photograph shows a ventral view. (c) Pharynx and  
 670 lingual apparatus. (d) The lingual apparatus of a fixed specimen. Scale bars = 1 cm.

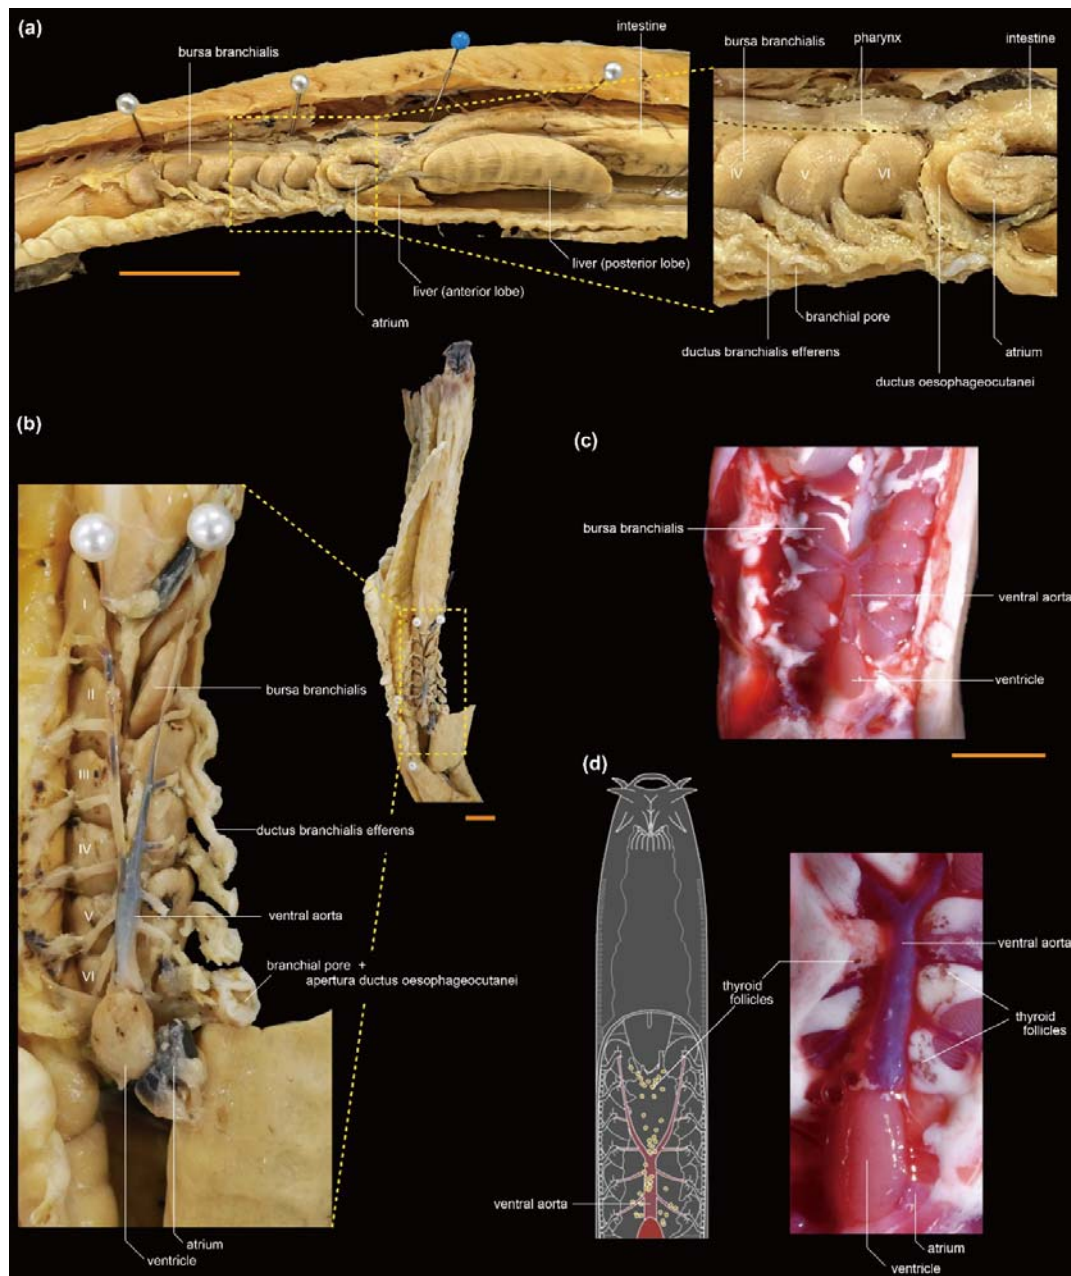

671

672 **FIGURE 4.** Cardiac anatomy and thyroid follicles of *Eptatretus burgeri*. (a) Left lateral view of  
673 a fixed specimen. We removed the lateral body wall and exposed the left lateral branchial  
674 structure. (b) Ventral view of the branchial organs of the same specimen as shown in panel (a).  
675 The left lateral body wall was removed, exposing the left-sided rows of the ductus branchialis  
676 efferens. (c) Ventral view of the branchial structure in an unfixed specimen. (d) Ventral view of  
677 the heart in an unfixed specimen. The thyroid follicles are in the white adipose tissue. The  
678 distribution of the thyroid follicles is shown in the diagram. Scale bars = 1 cm.

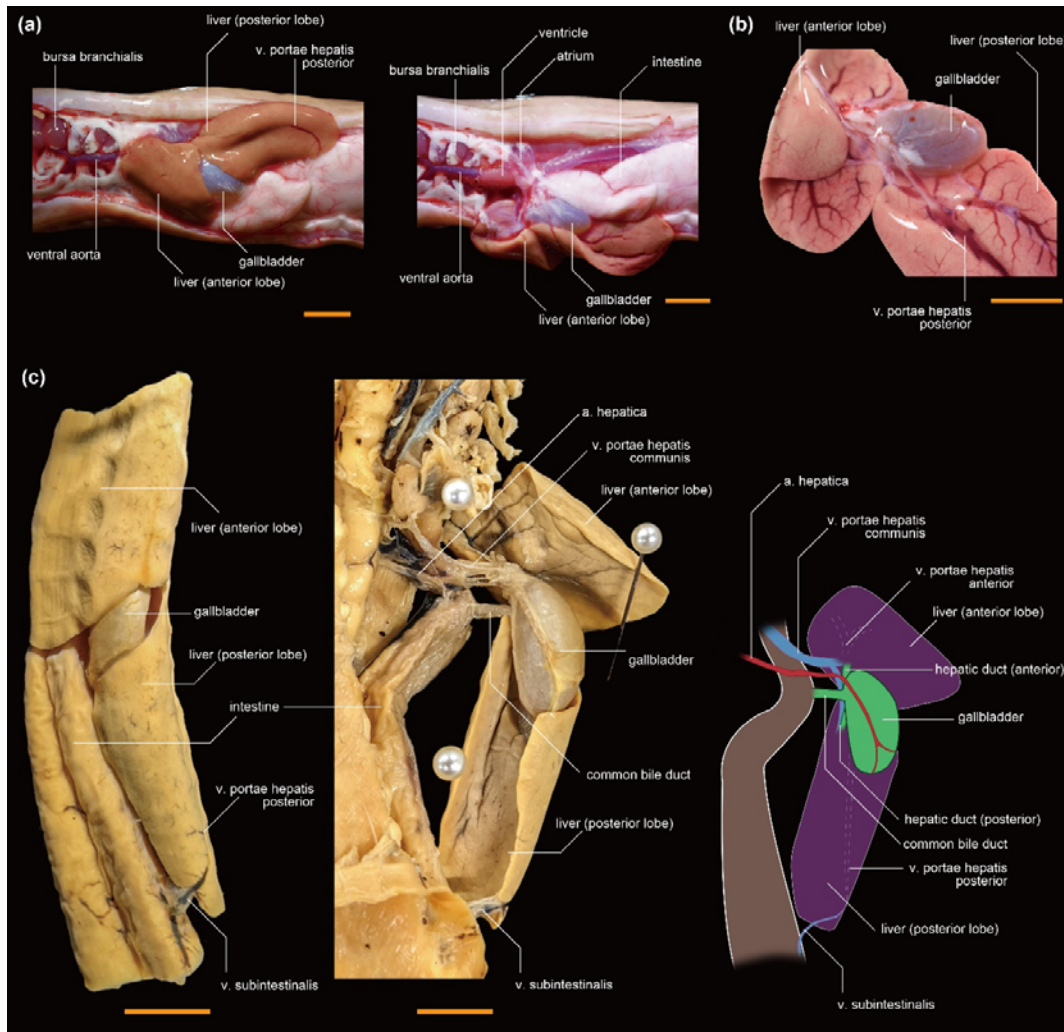

679

680 **FIGURE 5** The hepatobiliary organs of *Eptatretus burgeri*. (a) Ventral views of an unfixed  
681 specimen. The liver in the left-hand panel is shown almost in its natural position. In the right-  
682 hand panel, we have shifted the liver to the left side of the body, showing the junction of the  
683 hepatobiliary system with the intestinal tract. (b) The hepatobiliary system of an unfixed  
684 specimen, where the liver and gallbladder were severed from the intestinal tract and are shown  
685 from the intestinal side. (c) The hepatobiliary system of a fixed specimen shown from the  
686 ventral side. The liver in the left-hand panel is in its natural position. The middle panel shows  
687 the liver flipped over to the right side of the body, showing the extrahepatic biliary tract and  
688 vascular system. Scale bars = 1 cm.

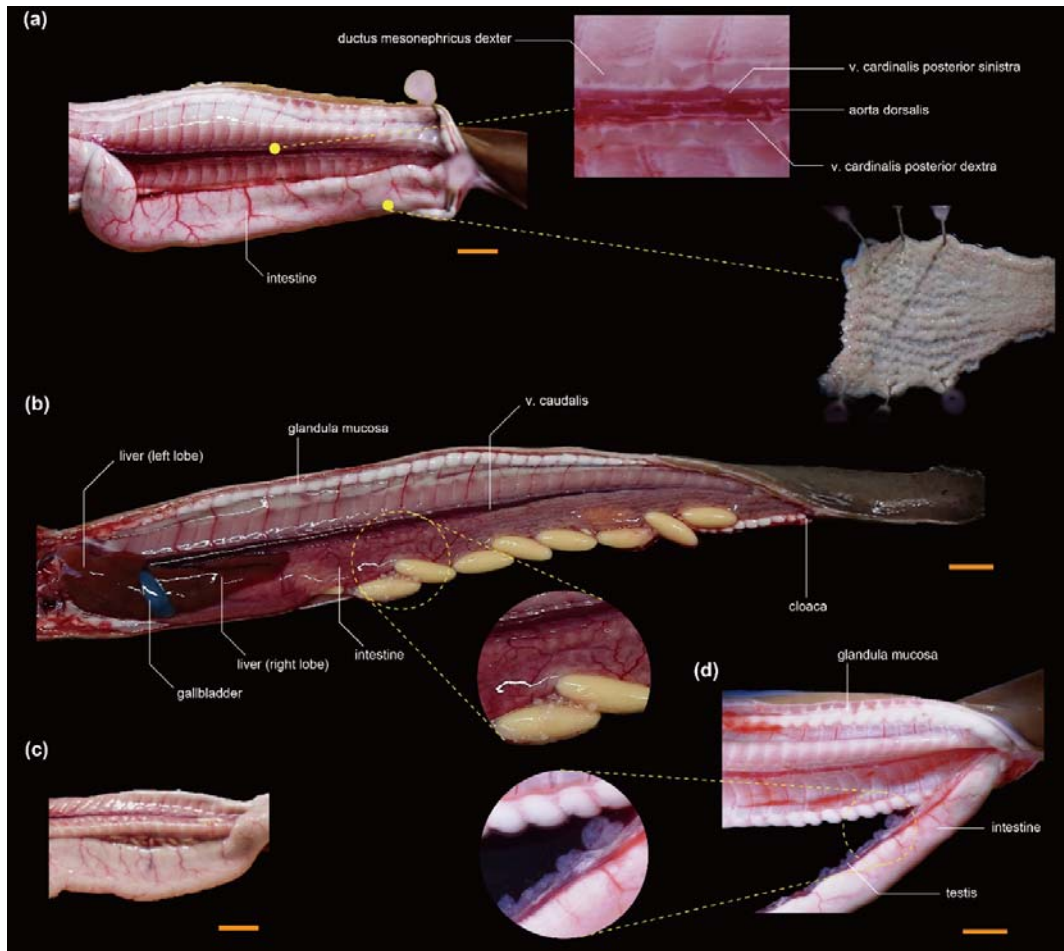

689

690 **FIGURE 6** The hindgut and urogenital organs of unfixed specimens of *Eptatretus burgeri*. (a)  
691 The intestinal tract is shown from the ventral side. Enlarged views are shown of the kidneys and  
692 the inner wall of the intestinal tract. In this specimen, the gonads are not mature, and the sexes  
693 are not distinguishable. (b) The female body cavity with mature ovaries. (c) A female with  
694 immature ovaries. (d) A mature male specimen. Scale bars = 1 cm.



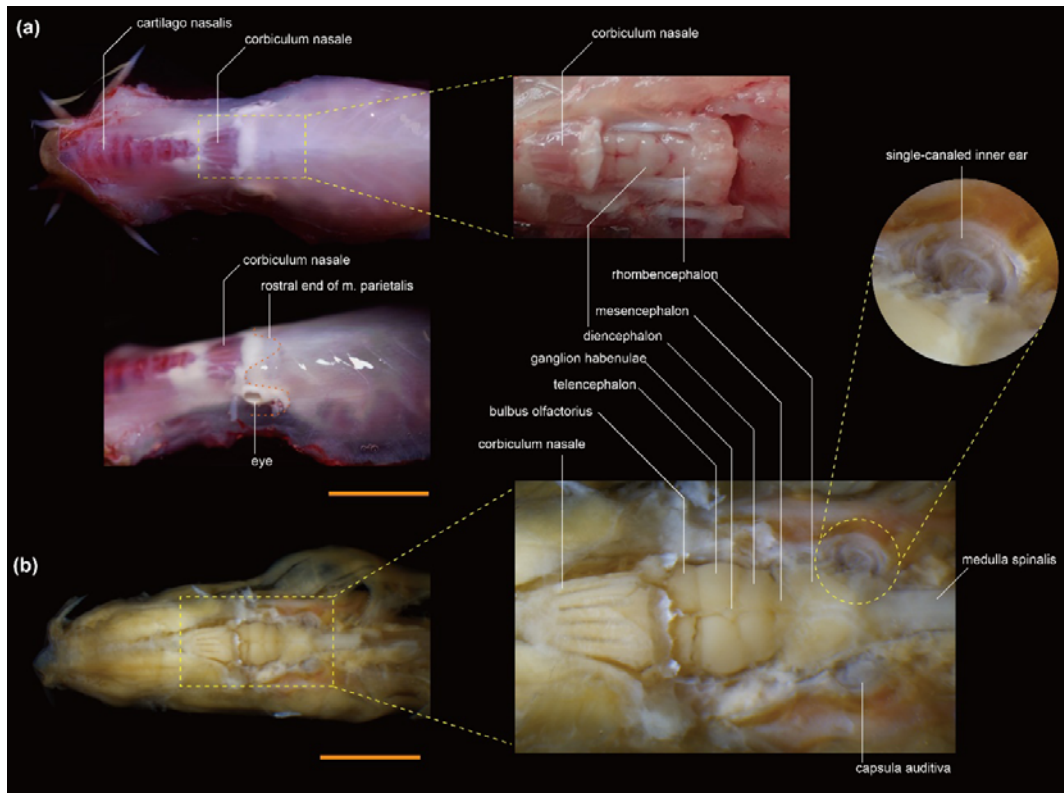

695

696 **FIGURE 7** The head of *Eptatretus burgeri*, with the skin removed. (a) The unfixed specimen.

697 (b) The fixed specimen. Scale bars = 1 cm.
